# Supplementary material
Source: Springer Nature journal article supplement (https://www.springermedizin.de/resource/supplementary/13195_2014_192_MOESM3_ESM.pdf/9688452)

A

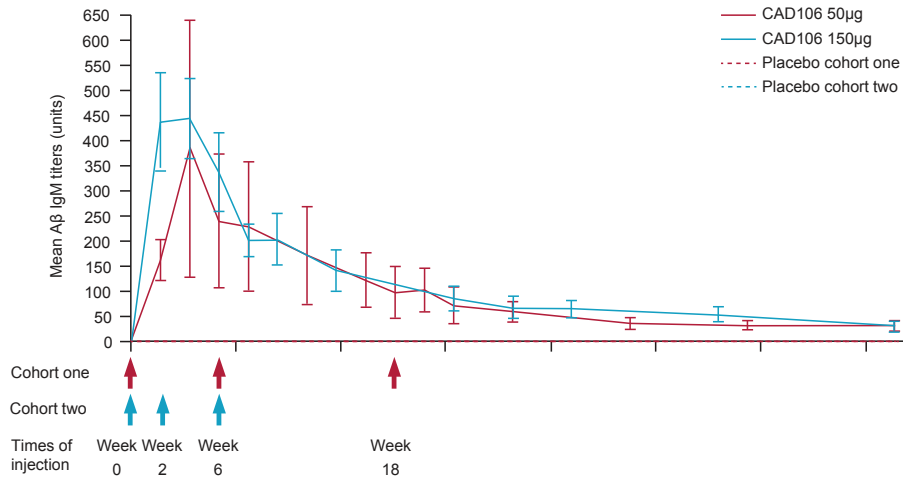

B

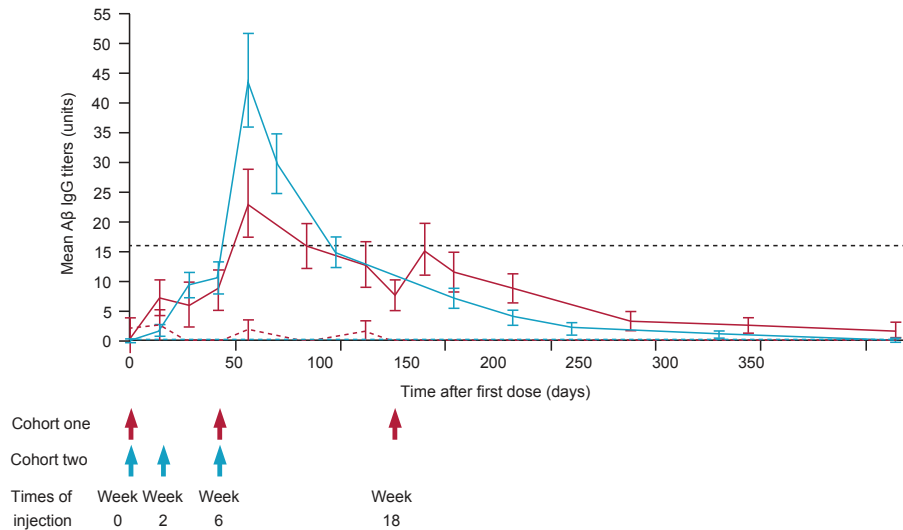

Supplement: MOESM3 [file 9688452]
